# Supplementary material for: Photophysical properties of three coordinated copper(i) complexes bearing 1,10-phenanthroline and a monodentate phosphine ligand
Source: Royal Society of Chemistry journal article supplement (doi:10.1039/c7dt02938a), 2017-01-01
Supplement: c7dt02938a1.pdf [file c7dt02938a1.pdf]

## Supporting Information

Title: Photophysical properties of three coordinated copper(I) complexes bearing 1,10-phenanthroline and a monodentate phosphine ligand

Authors: Daichi Kakizoe, Michihiro Nishikawa, Yasuo Fujii, Taro Tsubomura\*

Table S1. Crystallographic Data for **1-5**

Table S2. Photophysical data of **3** in degassed CH<sub>2</sub>Cl<sub>2</sub>.

Table S3. Potential of  $E_{\text{ox}}$  and  $E_{\text{red}}$  of **3** in the cyclic voltammograms.

Table S4. The important bond lengths and angles in the singlet optimized structure of **1** and **2**.

Table S5. The important bond lengths and angles in the singlet optimized structure of **3-5**.

Table S6. Result of DFT calculations based on the singlet optimized structures.

Fig. S1. Intermolecular interactions in the crystal of **2**.

Fig. S2. Intermolecular interactions in the crystal of **3**.

Fig. S3. Intermolecular interactions in the crystal of **4**

Fig. S4. Intermolecular interactions in the crystal of **5**.

Fig. S5. <sup>1</sup>H NMR spectrum of **1** in acetone-*d*<sub>6</sub> at room temperature.

Fig. S6. <sup>31</sup>P{<sup>1</sup>H} NMR spectrum of **1** in acetone-*d*<sub>6</sub> at room temperature

Fig. S7. <sup>1</sup>H NMR spectrum of **2** in CDCl<sub>3</sub> at room temperature.

Fig. S8. <sup>31</sup>P{<sup>1</sup>H} NMR spectrum of **2** in CDCl<sub>3</sub> at room temperature

Fig. S9. <sup>1</sup>H NMR spectrum of **3** in acetone-*d*<sub>6</sub> at room temperature.

Fig. S10. <sup>31</sup>P{<sup>1</sup>H} NMR spectrum of **3** in acetone-*d*<sub>6</sub> at room temperature.

Fig. S11. <sup>1</sup>H NMR spectrum of **4** in CDCl<sub>3</sub> at room temperature.

Fig. S12. <sup>31</sup>P{<sup>1</sup>H} NMR spectrum of **4** in CDCl<sub>3</sub> at room temperature.

Fig. S13. <sup>1</sup>H NMR spectrum of **5** in CDCl<sub>3</sub> at room temperature.

Fig. S14. <sup>31</sup>P{<sup>1</sup>H} NMR spectrum of **5** in CDCl<sub>3</sub> at room temperature.

Fig. S15 (a) Absorption spectrum of **3** in CH<sub>2</sub>Cl<sub>2</sub> (b) Emission spectrum of **3** in degassed CH<sub>2</sub>Cl<sub>2</sub> at room temperature. (c) Emission spectrum of **3** in the solid state.

Fig. S16 Cyclic voltammogram of 0.5mM of **3** in degassed 0.1M TBAPF<sub>6</sub>-acetone at room temperature at the scan rate of 0.2 V s<sup>-1</sup>.

Fig. S17. (a) Absorption spectra of **4** ( $7.63 \times 10^{-5}$  mol/L, blue), the ligand ( $7.65 \times 10^{-3}$  mol/L, orange) and the mixture of **4** and the ligand.

Fig. S18. The emission decay curves of **1** (a, blue), **2** (b, red), **3**(c, green), **4**(d, purple) and **5**(e, orange) in the solid state.

Fig. S19. Calculated Kohn-Sham orbitals of **1** and **2** in the singlet optimized structure.

Fig. S20. Calculated Kohn-sham orbitals of **3-5** in the singlet optimized structure.

Table S1. Crystallographic Data for 1-5

|                | <b>1</b>                                                                                        | <b>2</b>                                                                        |
|----------------|-------------------------------------------------------------------------------------------------|---------------------------------------------------------------------------------|
| Formula        | C <sub>55</sub> H <sub>52</sub> BCl <sub>2</sub> CuF <sub>4</sub> N <sub>2</sub> P <sub>2</sub> | C <sub>60</sub> H <sub>62</sub> BCuF <sub>4</sub> N <sub>2</sub> P <sub>2</sub> |
| Volume         | 2462.9(8)                                                                                       | 2679.7(11)                                                                      |
| Temperature, K | 123 K                                                                                           | 123 K                                                                           |
| Cryst syst     | triclinic                                                                                       | triclinic                                                                       |
| Space group    | P -1                                                                                            | P -1                                                                            |
| <i>a</i> , Å   | 12.733(2)                                                                                       | 11.685(3)                                                                       |
| <i>b</i> , Å   | 12.864(3)                                                                                       | 12.569(3)                                                                       |
| <i>c</i> , Å   | 16.184(3)                                                                                       | 20.476(5)                                                                       |
| <i>α</i> deg   | 85.465(5)                                                                                       | 90.8113(18)                                                                     |
| <i>β</i> deg   | 69.861(4)                                                                                       | 99.2685(19)                                                                     |
| <i>γ</i> deg   | 81.954(5)                                                                                       | 114.950(2)                                                                      |
| <i>Z</i>       | 2                                                                                               | 2                                                                               |
| <i>μ</i>       | 0.672                                                                                           | 0.521                                                                           |
| R1, wR2        | 0.0413, 0.1393                                                                                  | 0.0498, 0.1627                                                                  |

  

|                | <b>3</b>                                                           | <b>4</b>                                                           | <b>5</b>                                                           |
|----------------|--------------------------------------------------------------------|--------------------------------------------------------------------|--------------------------------------------------------------------|
| Formula        | C <sub>33</sub> H <sub>29</sub> BCuF <sub>4</sub> N <sub>2</sub> P | C <sub>32</sub> H <sub>35</sub> BCuF <sub>4</sub> N <sub>2</sub> P | C <sub>36</sub> H <sub>39</sub> BCuF <sub>4</sub> N <sub>2</sub> P |
| Volume         | 2949.7(10)                                                         | 1464(7)                                                            | 3171.3(4)                                                          |
| Temperature, K | 123 K                                                              | 123 K                                                              | 123 K                                                              |
| Cryst syst     | monoclinic                                                         | triclinic                                                          | monoclinic                                                         |
| Space group    | P 1 21/c 1                                                         | P -1                                                               | P 1 21/n 1                                                         |
| <i>a</i> , Å   | 11.322(2)                                                          | 11.05(3)                                                           | 10.3902(10)                                                        |
| <i>b</i> , Å   | 17.180(3)                                                          | 11.05(3)                                                           | 22.6124(11)                                                        |
| <i>c</i> , Å   | 15.165(4)                                                          | 14.68(5)                                                           | 13.9326(11)                                                        |
| <i>α</i> deg   | 90.000(4)                                                          | 106.568(7)                                                         | 90                                                                 |
| <i>β</i> deg   | 90.000(4)                                                          | 97.406(6)                                                          | 104.351(3)                                                         |
| <i>γ</i> deg   | 90.184(4)                                                          | 116.748(8)                                                         | 90                                                                 |
| <i>Z</i>       | 4                                                                  | 2                                                                  | 4                                                                  |
| <i>μ</i>       | 0.846                                                              | 0.851                                                              | 0.792                                                              |
| R1, wR2        | 0.0993, 0.2773                                                     | 0.0356, 0.1334                                                     | 0.0318, 0.0769                                                     |

Table S2 Photophysical data of **3** in degassed CH<sub>2</sub>Cl<sub>2</sub>.

| Complex  | $\lambda_{\text{abs}}$<br>/nm | $\epsilon$<br>/10 <sup>3</sup> M <sup>-1</sup> cm <sup>-1</sup> | $\lambda_{\text{em, max}}$<br>/nm | $\tau$<br>/μs | $\Phi$         |
|----------|-------------------------------|-----------------------------------------------------------------|-----------------------------------|---------------|----------------|
| <b>3</b> | 389                           | 0.72                                                            | 610 <sup>a</sup>                  | 0.084         | - <sup>b</sup> |

<sup>a</sup> excited by 390nm <sup>b</sup> Not determined

Table S3 Potential of  $E_{\text{ox}}$  and  $E_{\text{red}}$  of **3** in the cyclic voltamograms.

| Complex  | $E_{\text{ox}}^a$ / V | $E_{\text{red}}$ / V |
|----------|-----------------------|----------------------|
| <b>3</b> | 0.82                  | - <sup>b</sup>       |

<sup>a</sup> Potential of the peak of the oxidation wave. <sup>b</sup> Not determined.

Table S4 The important bond lengths and angles in the singlet optimized structure of **1** and **2**.

| Complex  | N1-Cu<br>/Å | N2-Cu<br>/Å | P1-Cu<br>/Å | P2-Cu<br>/Å | N1-Cu-N2<br>/° | P1-Cu-P2<br>/° |
|----------|-------------|-------------|-------------|-------------|----------------|----------------|
| <b>1</b> | 2.14561     | 2.14161     | 2.30133     | 2.30532     | 78.76136       | 128.50847      |
| <b>2</b> | 2.15082     | 2.13996     | 2.30254     | 2.29415     | 78.56522       | 124.15544      |

Table S5 The important bond lengths and angles in the singlet optimized structure of **3-5**.

| Complex  | N1-Cu<br>/Å | N2-Cu<br>/Å | P-Cu<br>/Å | N1-Cu-N2<br>/° | N1-Cu-P<br>/° | N2-Cu-P<br>/° |
|----------|-------------|-------------|------------|----------------|---------------|---------------|
| <b>3</b> | 2.13159     | 2.03719     | 2.22765    | 81.20213       | 125.95865     | 152.76765     |
| <b>4</b> | 2.11401     | 2.09034     | 2.25085    | 80.46377       | 129.86539     | 129.01831     |
| <b>5</b> | 2.07079     | 2.10425     | 2.22599    | 81.02754       | 131.60650     | 127.51854     |

Table S6. Result of DFT calculations based on the singlet optimized structures.

| Complex  | orbital | Energy /<br>eV | Cu <sup>a</sup> | NN <sup>b</sup> | P <sub>atom</sub> <sup>c</sup> | P <sub>Ph</sub> <sup>d</sup> | P <sub>alkyl</sub> <sup>e</sup> | Biaryl <sup>f</sup> |
|----------|---------|----------------|-----------------|-----------------|--------------------------------|------------------------------|---------------------------------|---------------------|
| <b>1</b> | LUMO+1  | -4.34          | 0.16            | 98              | 0.77                           | 0.3                          | -                               | -                   |
|          | LUMO    | -4.41          | 2.18            | 96.03           | 1.06                           | 0.73                         | -                               | -                   |
|          | HOMO    | -7.72          | 45.82           | 4.83            | 12.9                           | 36.4                         | -                               | -                   |
|          | HOMO-1  | -7.9           | 63.2            | 3.73            | 2.79                           | 30.2                         | -                               | -                   |
|          | HOMO-2  | -8.09          | 81.55           | 14.39           | 0.24                           | 3.82                         | -                               | -                   |
| <b>2</b> | LUMO+1  | -4.24          | 0.1             | 98.8            | 0.74                           | 0.33                         | -                               | -                   |
|          | LUMO    | -4.32          | 2.3             | 95.9            | 1                              | 0.8                          | -                               | -                   |
|          | HOMO    | -7.54          | 47.6            | 4.58            | 12.6                           | 35.2                         | -                               | -                   |
|          | HOMO-1  | -7.82          | 61              | 3.24            | 0.44                           | 35.3                         | -                               | -                   |
|          | HOMO-2  | -7.98          | 81.1            | 14.5            | 0.1                            | 4.4                          | -                               | -                   |
| <b>3</b> | LUMO+1  | -4.76          | 0.32            | 94.02           | 0                              | 5.7                          | -                               | -                   |
|          | LUMO    | -5.00          | 2.9             | 94.6            | 0.29                           | 2.24                         | -                               | -                   |
|          | HOMO    | -8.34          | 64.8            | 9.5             | 4.22                           | 21.5                         | -                               | -                   |
|          | HOMO-1  | -8.76          | 50.83           | 8.24            | 5.45                           | 35.47                        | -                               | -                   |
|          | HOMO-2  | -8.99          | 5.5             | 0.43            | 0.28                           | 93.76                        | -                               | -                   |
| <b>4</b> | LUMO+1  | -4.62          | 0.18            | 99.1            | 0.3                            | -                            | 0.2                             | 0.19                |
|          | LUMO    | -4.76          | 2.26            | 96.37           | 0.45                           | -                            | 0.27                            | 0.64                |
|          | HOMO    | -8.11          | 67.98           | 3.52            | 4.5                            | -                            | 7.7                             | 16.3                |
|          | HOMO-1  | -8.35          | 76.18           | 15.32           | 1.1                            | -                            | 2.9                             | 4.4                 |
|          | HOMO-2  | -8.76          | 76.17           | 5.0             | 0.19                           | -                            | 2.95                            | 15.7                |
| <b>5</b> | LUMO+1  | -4.59          | 0.16            | 99.2            | 0.35                           | -                            | 0.14                            | 0.15                |
|          | LUMO    | -4.74          | 2.58            | 96.17           | 0.34                           | -                            | 0.23                            | 0.68                |
|          | HOMO    | -8.1           | 68.5            | 4.27            | 3.57                           | -                            | 7.9                             | 15.8                |
|          | HOMO-1  | -8.33          | 74.8            | 14.85           | 1.67                           | -                            | 3.79                            | 4.87                |
|          | HOMO-2  | -8.76          | 76.14           | 5.03            | 0.72                           | -                            | 3.94                            | 14.16               |

<sup>a</sup> Components moiety of the copper atom (%). <sup>b</sup> Components moiety of the diimine ligand (%). <sup>c</sup> Components moiety of the phosphorus atom (%). <sup>d</sup> Components moiety of the monodentate phosphine ligand except the phosphorus atom (%). <sup>e</sup> Components moiety of the alkyl group (%). <sup>f</sup> Components moiety of the biaryl unit (%)

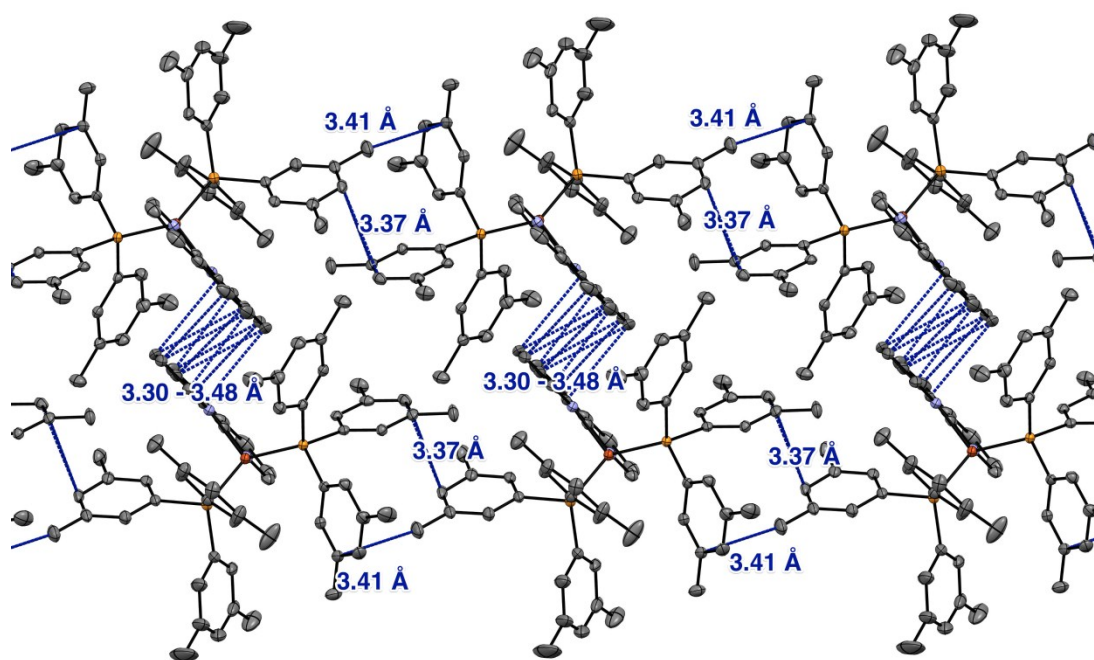

Fig. S1. Intermolecular interactions in the crystal of 2.

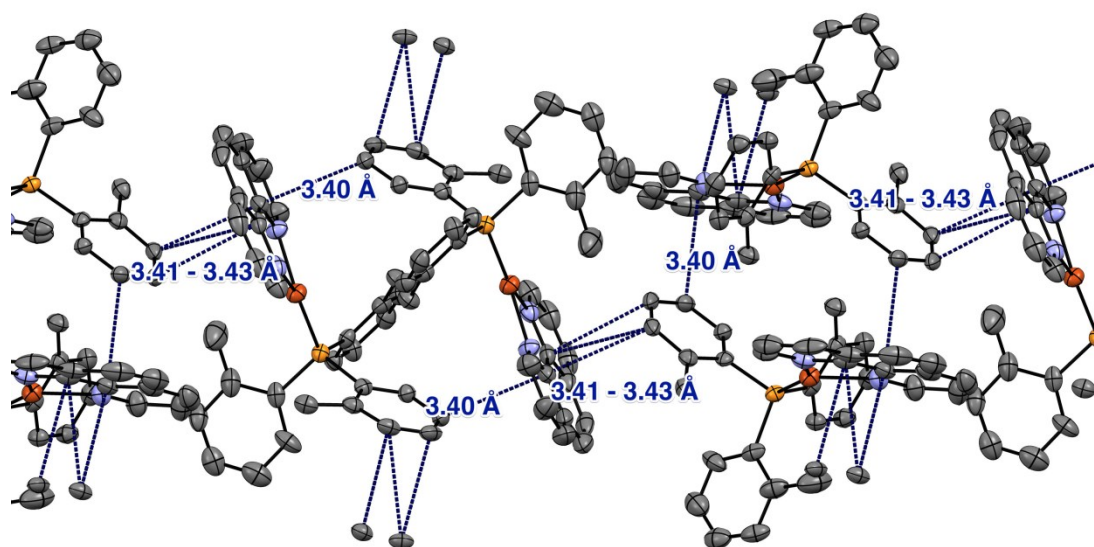

Fig. S2. Intermolecular interactions in the crystal of 3.

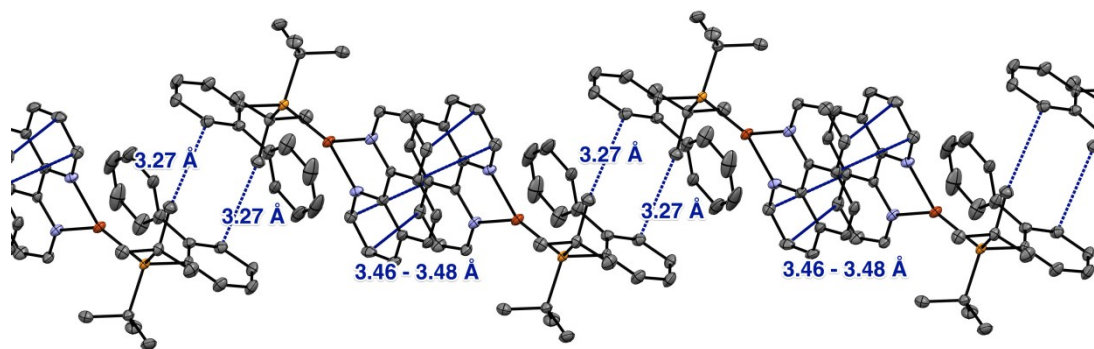

Fig. S3. Intermolecular interactions in the crystal of **4**

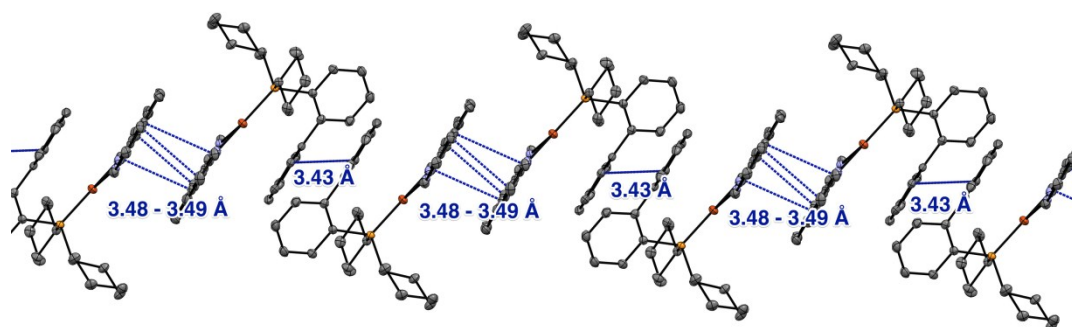

Fig. S4. Intermolecular interactions in the crystal of **5**.

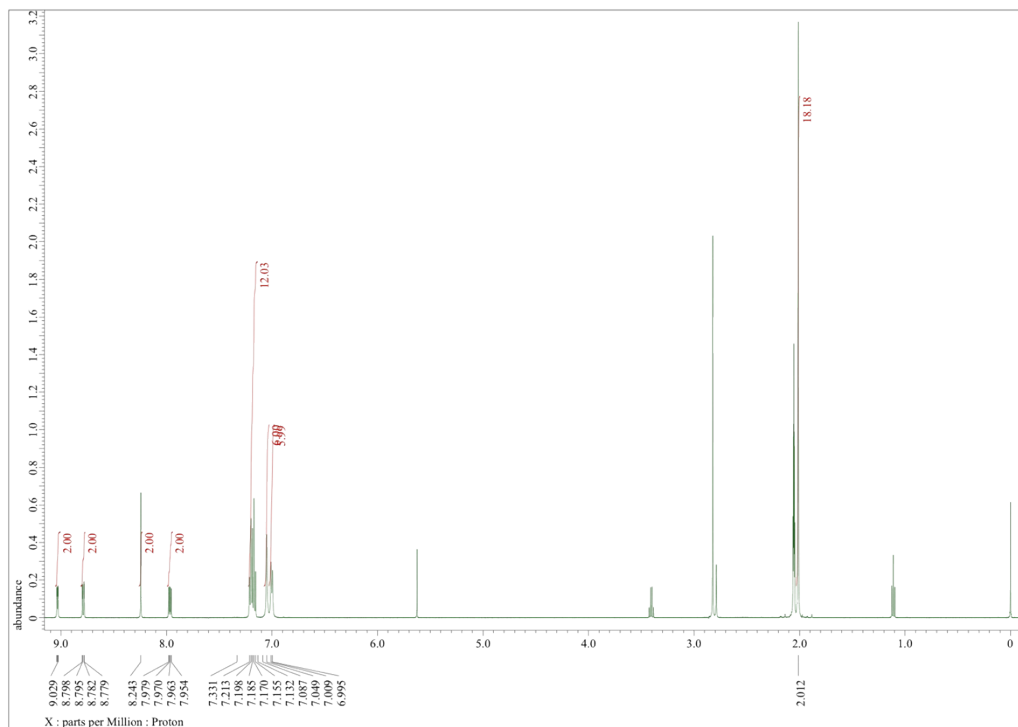

Fig. S5.  $^1\text{H}$  NMR spectrum of **1** in acetone- $d_6$  at room temperature.

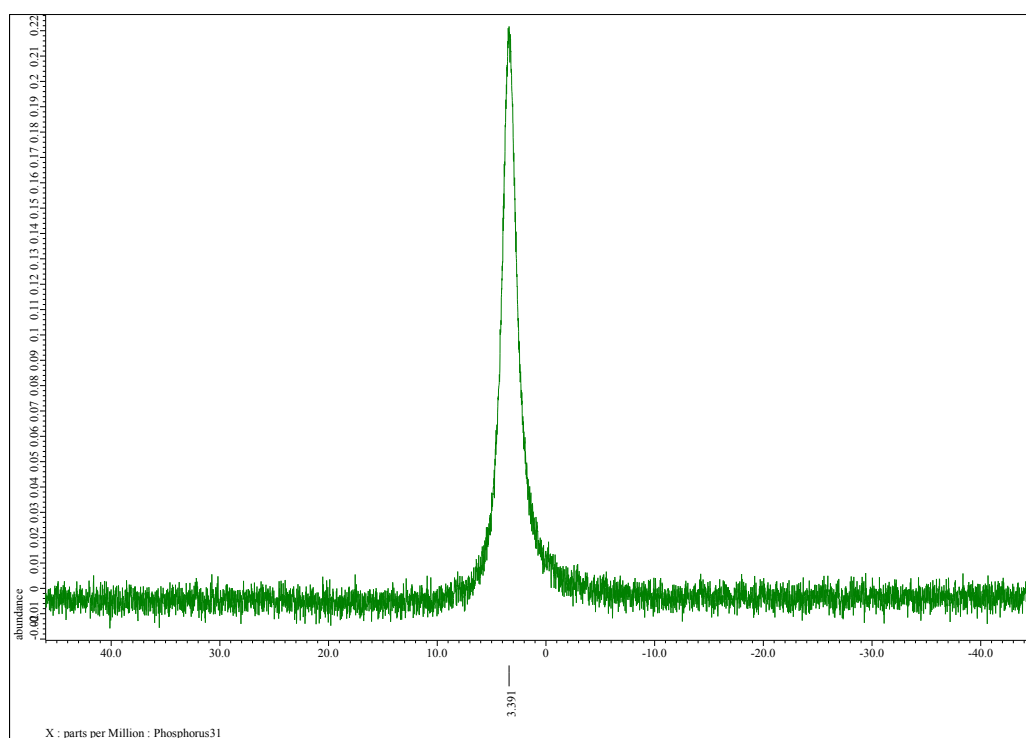

Fig. S6.  $^{31}\text{P}\{^1\text{H}\}$  NMR spectrum of **1** in acetone- $d_6$  at room temperature.

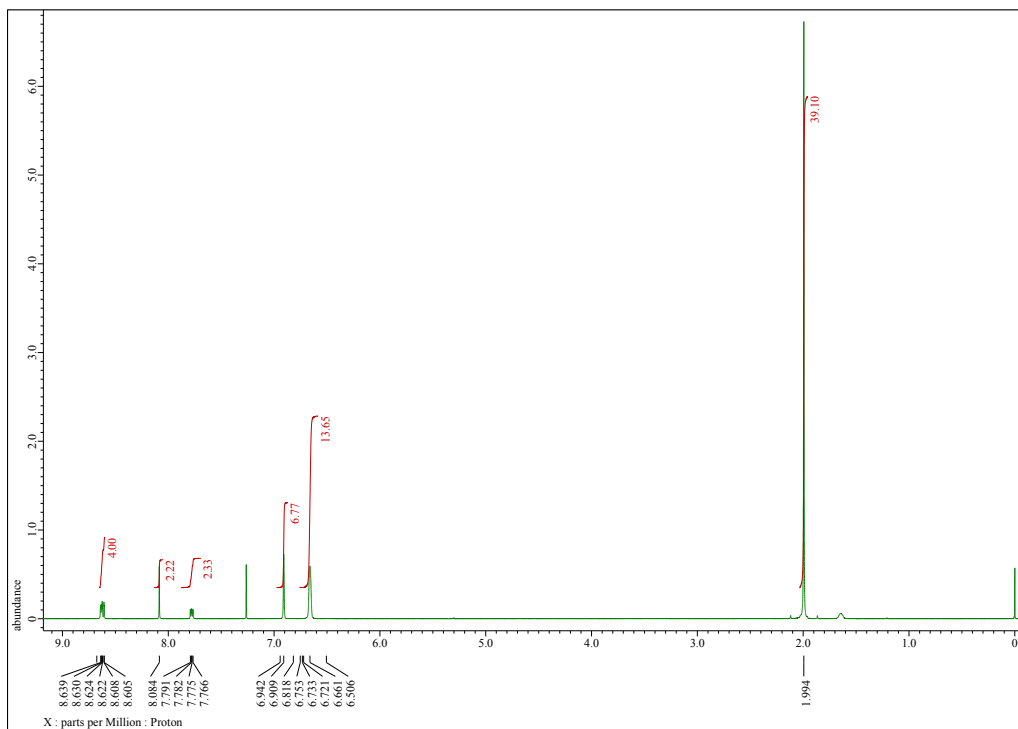

Fig. S7.  $^1\text{H}$  NMR spectrum of **2** in  $\text{CDCl}_3$  at room temperature.

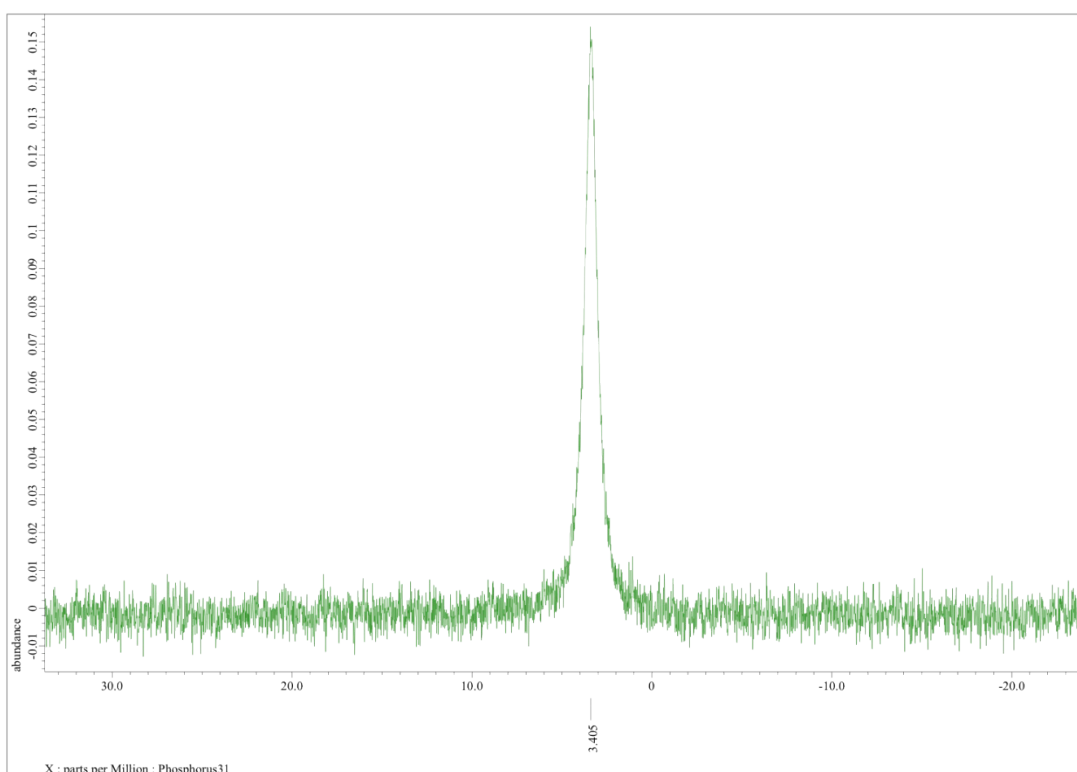

Fig. S8.  $^{31}\text{P}\{^1\text{H}\}$  NMR spectrum of **2** in  $\text{CDCl}_3$  at room temperature



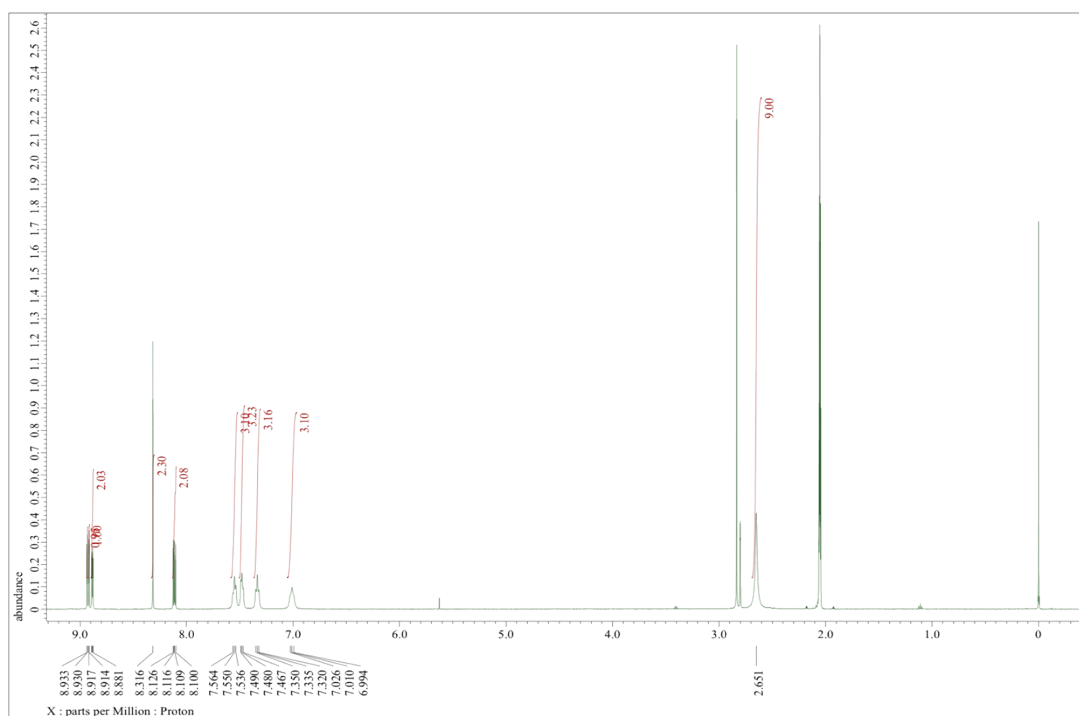

Fig. S9.  $^1\text{H}$  NMR spectrum of **3** in acetone- $d_6$  at room temperature.

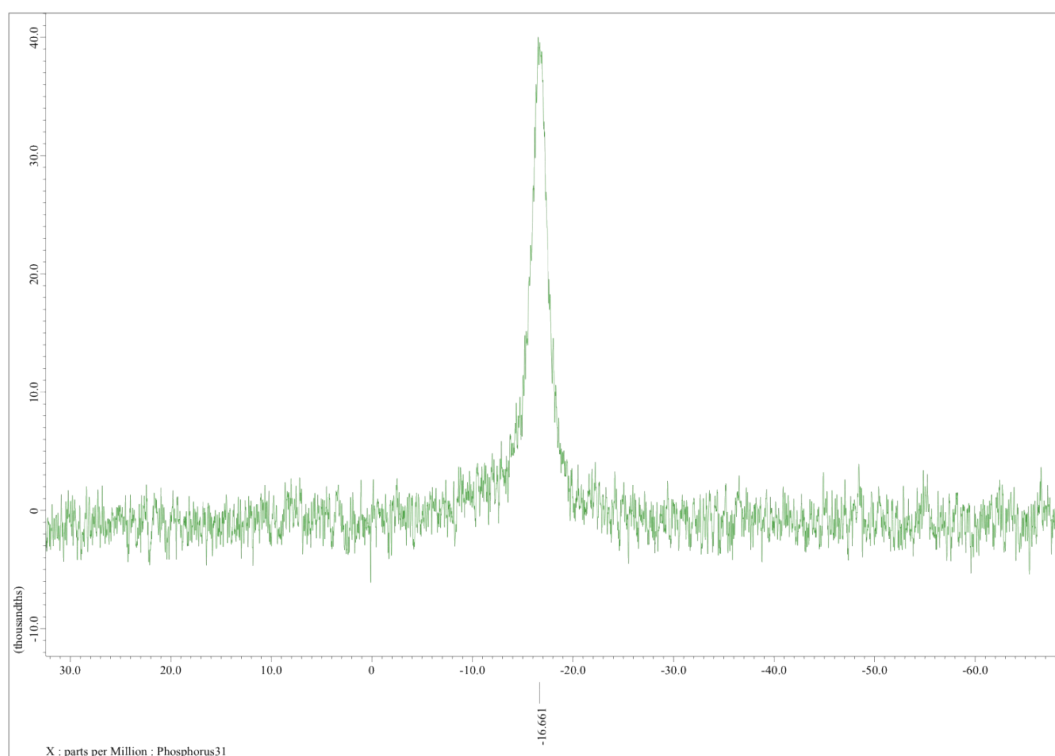

Fig. S10.  $^{31}\text{P}\{^1\text{H}\}$  NMR spectrum of **3** in acetone- $d_6$  at room temperature.

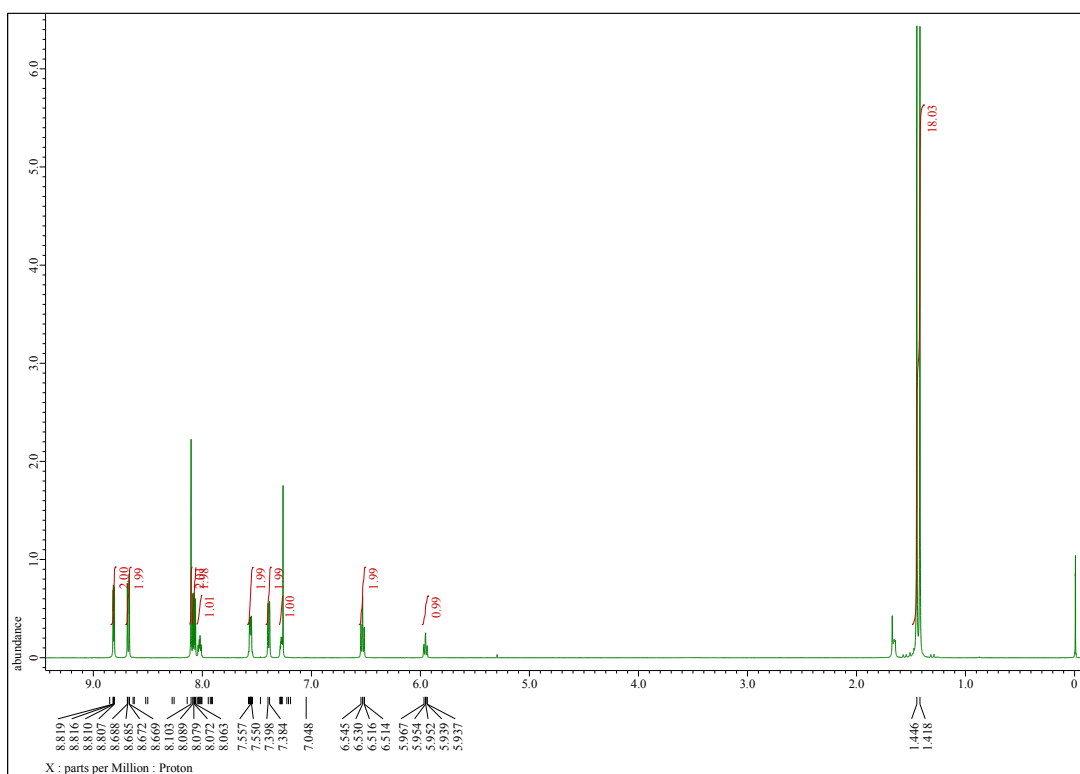

Fig. S11.  $^1\text{H}$  NMR spectrum of **4** in  $\text{CDCl}_3$  at room temperature.

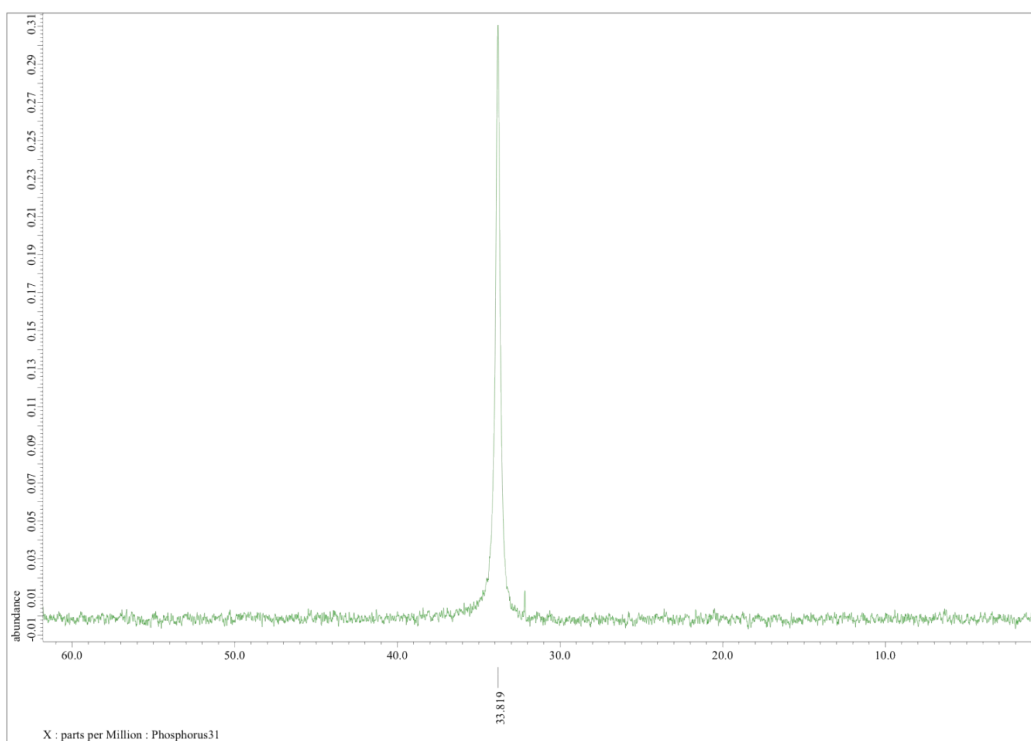

Fig. S12.  $^{31}\text{P}\{^1\text{H}\}$  NMR spectrum of **4** in  $\text{CDCl}_3$  at room temperature.

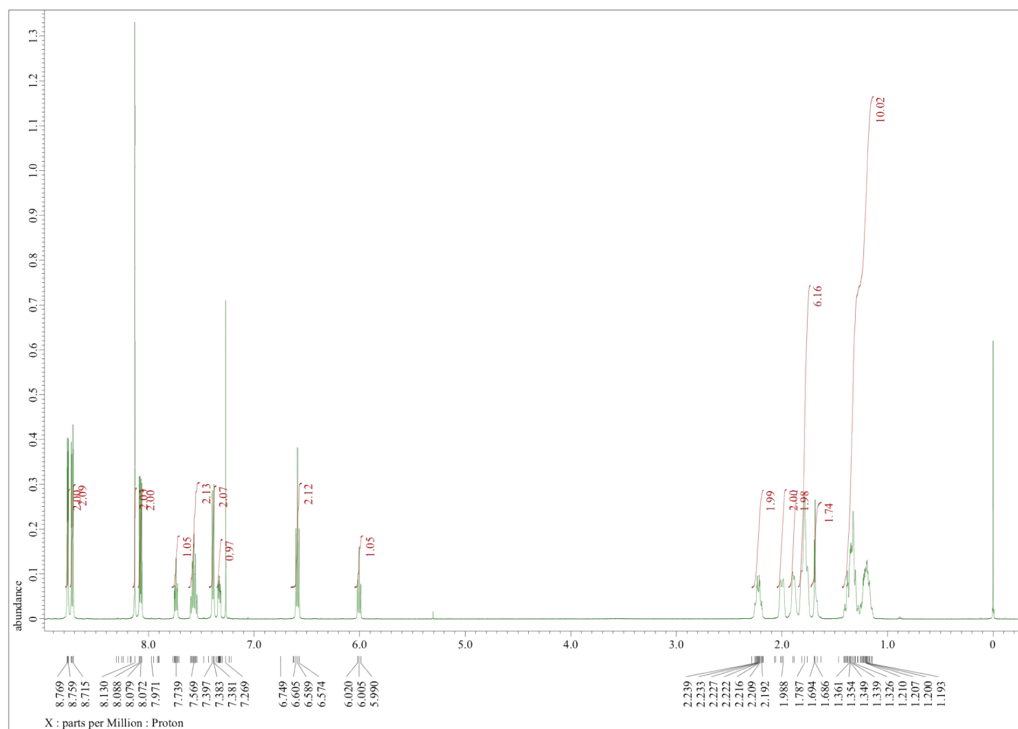

Fig. S13.  $^1\text{H}$  NMR spectrum of **5** in  $\text{CDCl}_3$  at room temperature.

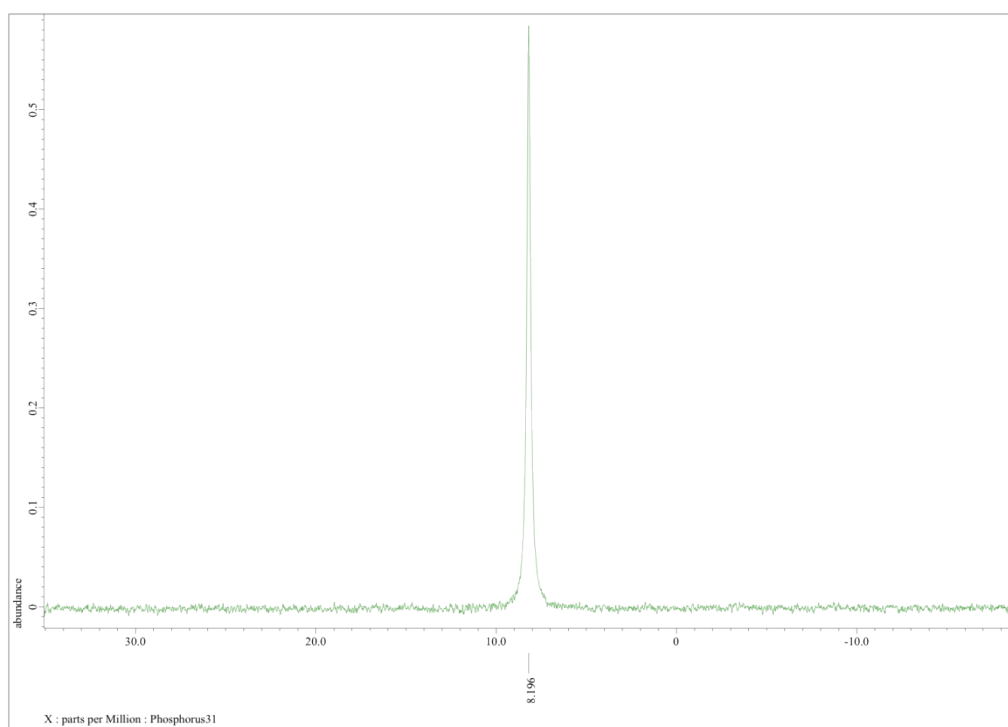

Fig. S14.  $^{31}\text{P}\{^1\text{H}\}$  NMR spectrum of **5** in  $\text{CDCl}_3$  at room temperature.

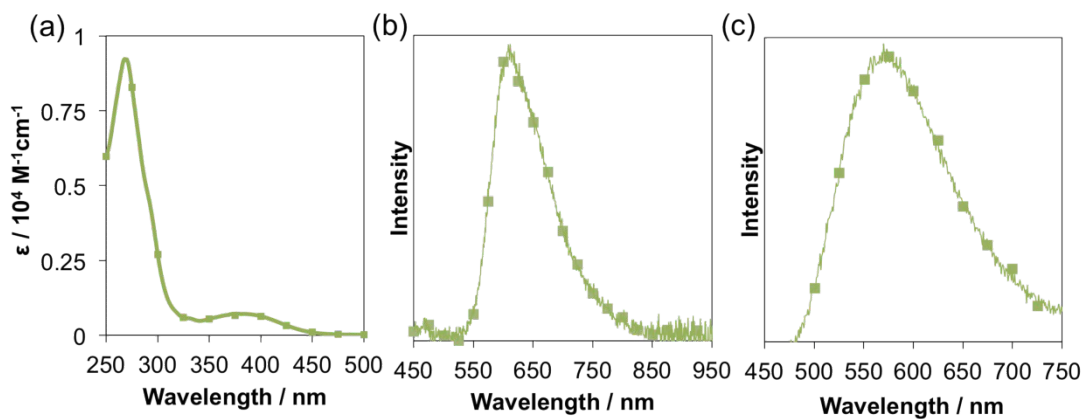

Fig. S15 (a) Absorption spectrum of **3** in  $\text{CH}_2\text{Cl}_2$  (b) Emission spectrum of **3** in degassed  $\text{CH}_2\text{Cl}_2$  at room temperature. (c) Emission spectrum of **3** in the solid state.

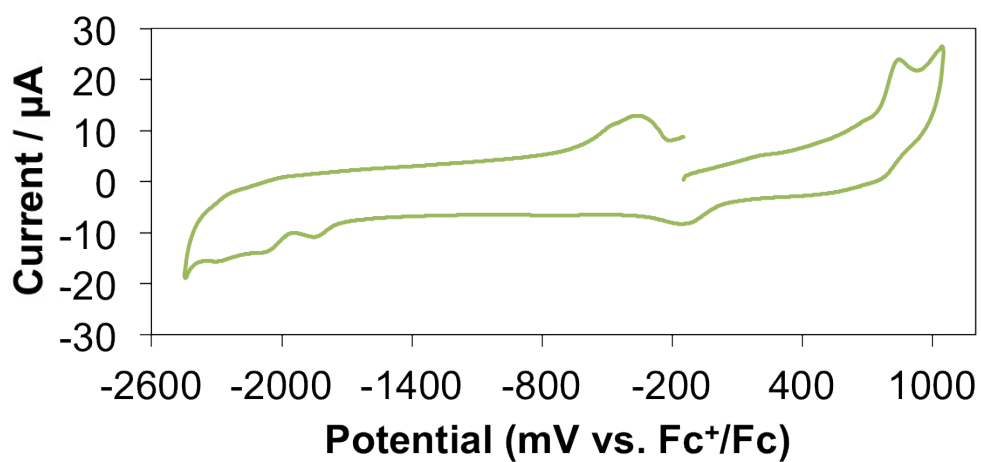

Fig. S16 Cyclic voltammogram of 0.5mM of **3** in degassed 0.1M  $\text{TBAPF}_6$ -acetone at room temperature at the scan rate of  $0.2 \text{ V s}^{-1}$ .

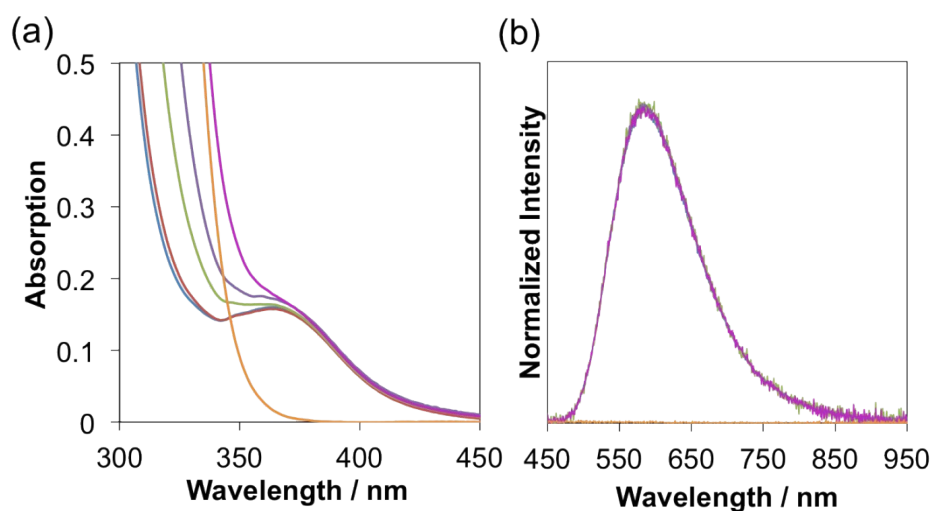

Fig. S17. (a) Absorption spectra of **4** ( $7.63 \times 10^{-5}$  mol/L, blue), the ligand ( $7.65 \times 10^{-3}$  mol/L, orange) and the mixture of **4** and the ligand in the ratio of 1:2.5(red), 1:11(green), 1:25(purple) and 1:95(magenta) in CH<sub>2</sub>Cl<sub>2</sub> at room temperature. (b) Emission spectra of **4**( $7.63 \times 10^{-5}$  mol/L, blue), the ligand ( $7.65 \times 10^{-3}$  mol/L, orange) and the mixture of **4** and the ligand in the ratio of 1:2.5(red), 1:11(green), 1:25(purple) and 1:95(magenta) in CH<sub>2</sub>Cl<sub>2</sub> in degassed CH<sub>2</sub>Cl<sub>2</sub> by 20 min argon bubbling.

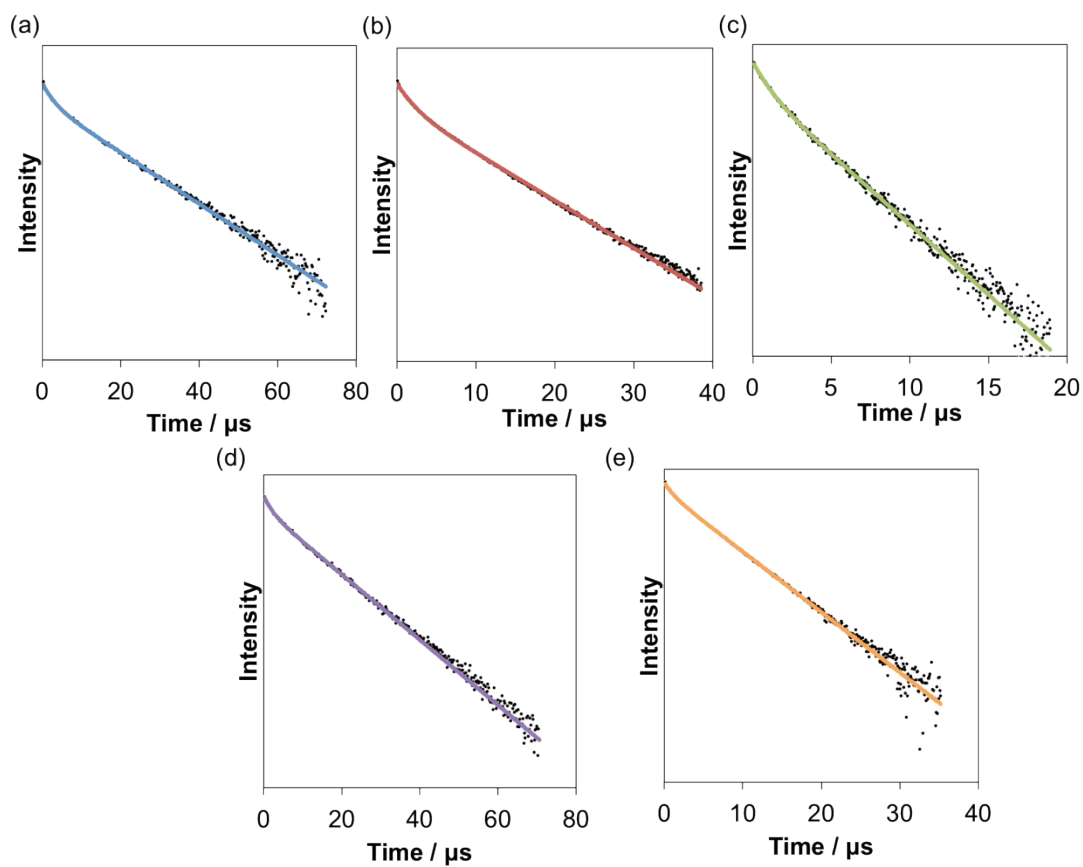

Fig. S18. The emission decay curves of **1** (a, blue), **2** (b, red), **3**(c, green), **4**(d, purple) and **5**(e, orange) in the solid state. The colored solid line in the figures represent the fitted curves with double exponential functions.

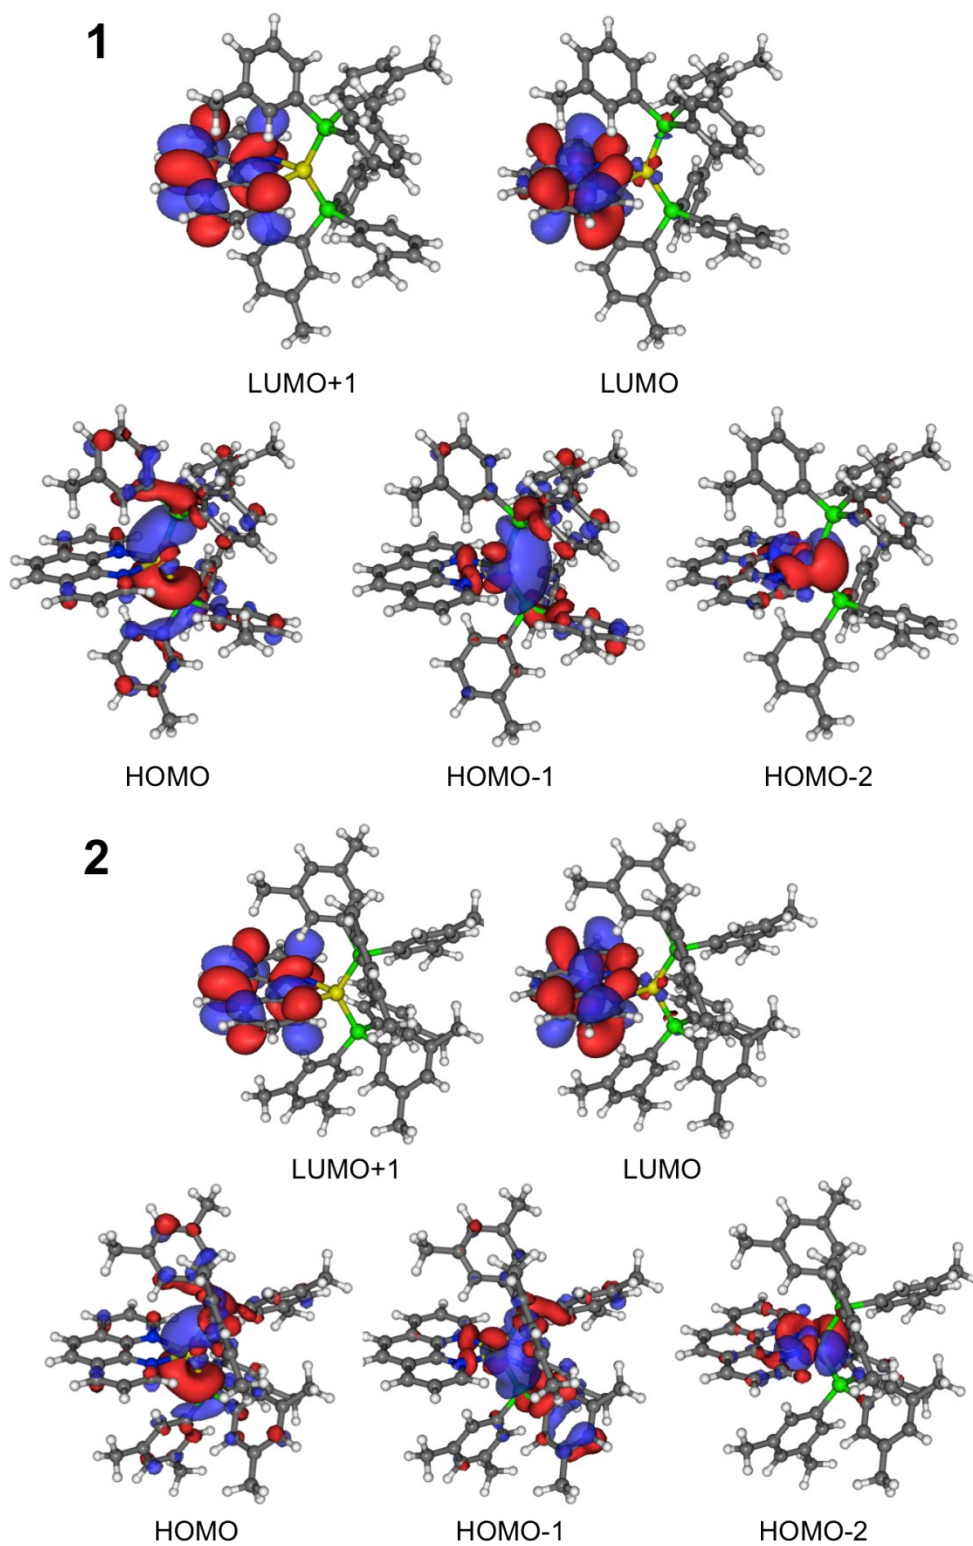

Fig. S19. Calculated Kohn-Sham orbitals of **1** and **2** in the singlet optimized structure. (Isosurface value, 0.02)

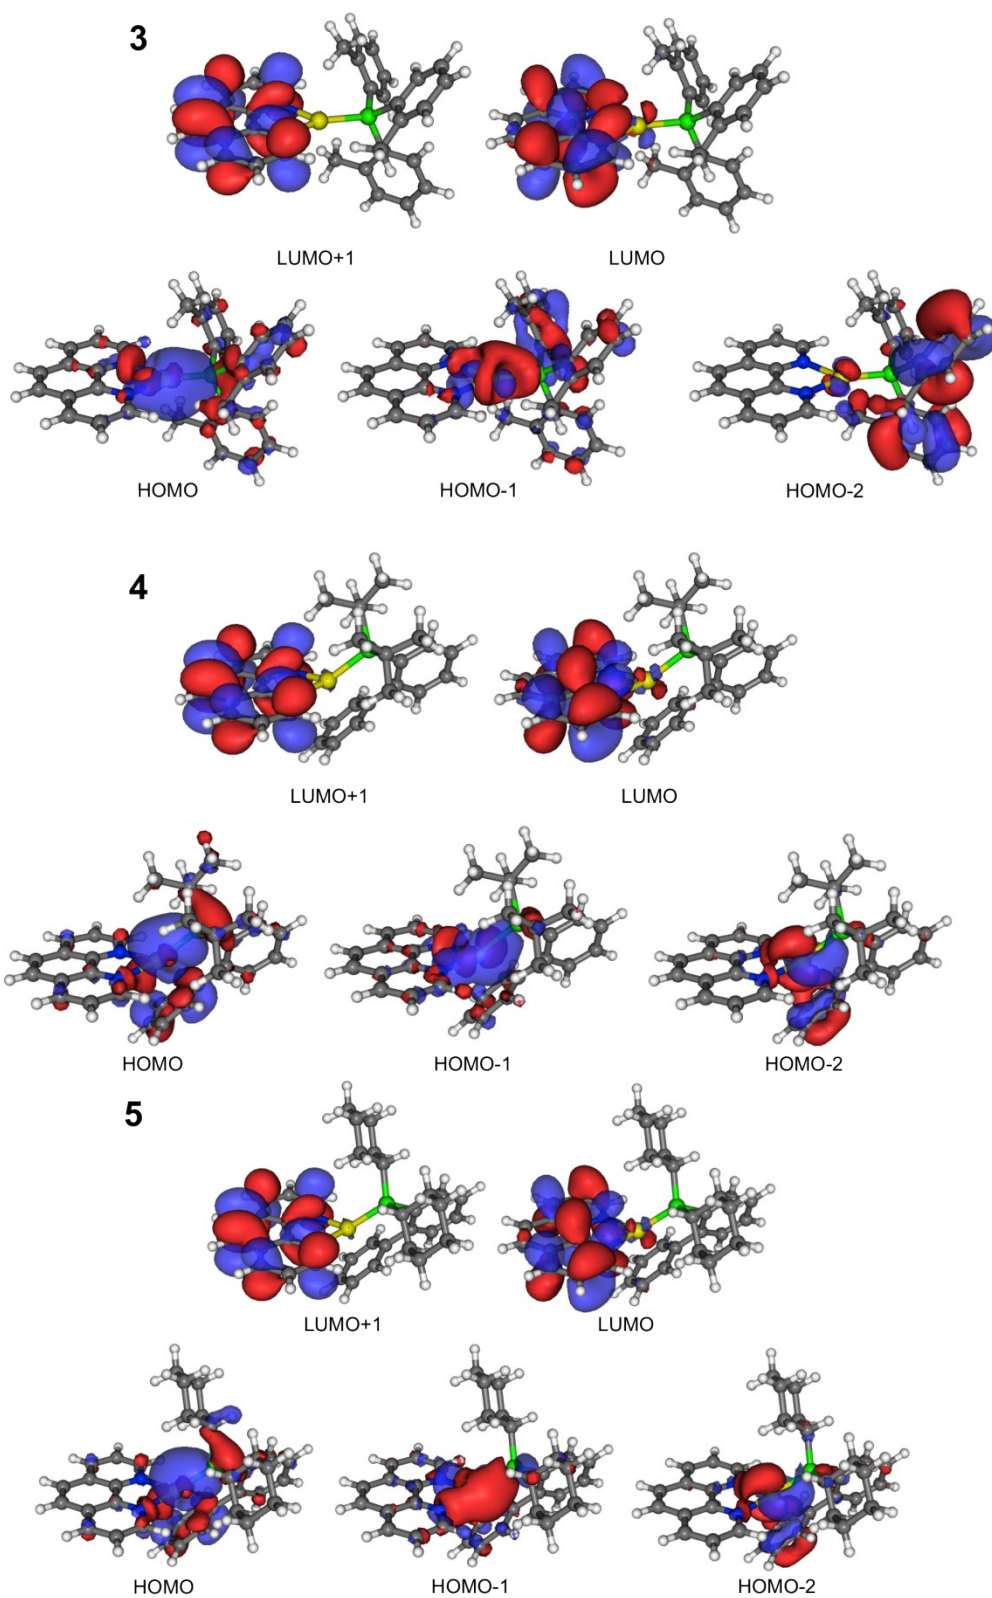

Fig. S20. Calculated Kohn-sham orbitals of **3-5** in the singlet optimized structure. (Isosurface value, 0.02)
